# Supplementary material
Source: PubMed Central journal article supplement (PMC8277885)
Supplement: NIHMS1664483-supplement-1.pdf [file NIHMS1664483-supplement-1.pdf]

## Supporting Information

### Delivery of Anti-miR-712 to Inflamed Endothelial Cells Using pBAE Nanoparticles Conjugated with VCAM-1 Targeting Peptide

Pere Dosta, Ian Tamargo, Victor Ramos, Sandeep Kumar<sup>1</sup>, Dong Won Kang<sup>1</sup>, Salvador Borrós\*, Hanjoong Jo\*

#### 1. Synthesis of pBAE polymers

Synthesis of poly( $\beta$ -amino ester)s (pBAEs) was performed via a two-step procedure, as previously described.<sup>[1]</sup> First, addition reaction of primary amines to an excess of diacrylates was used to synthesize an acrylate-terminated polymer (termed C6 polymer). Second, C6 polymer was end-capped with different thiol-terminated oligopeptides composed of Cys + 3 amino acids (Arg, Lys, His, Asp, or Glu). Synthesized structures were characterized by <sup>1</sup>H-NMR, recorded in a 400 MHz Varian (NMR Instruments, Clarendon Hills, IL). The molecular weight of C6 polymer was determined by HPLC.

#### C6 Polymer

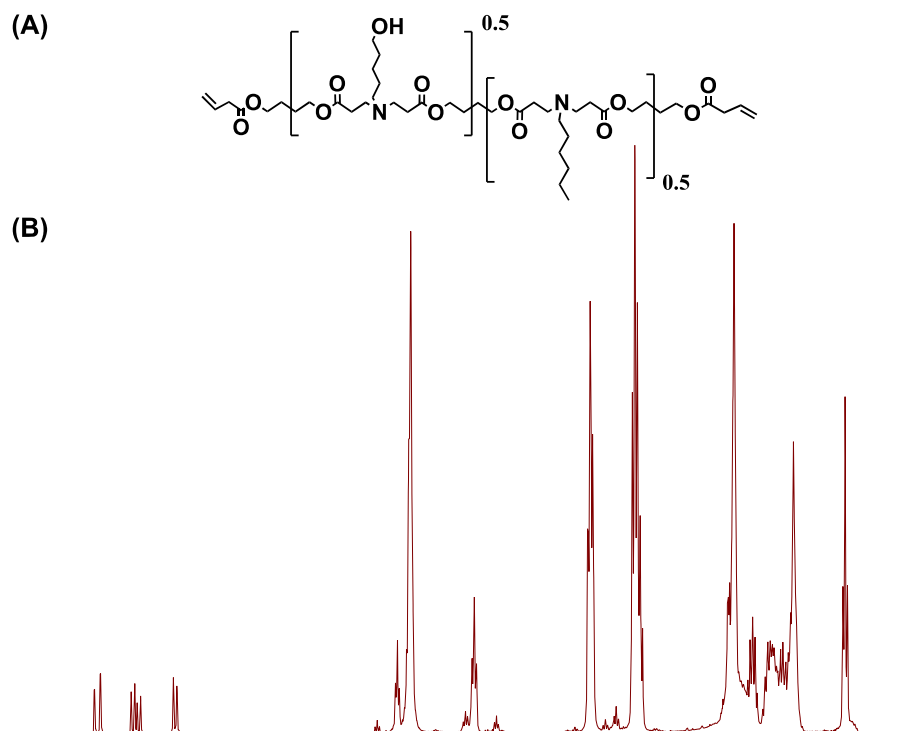

**Figure S1:** (A) Chemical structure of C6 polymer. (B)  $^1\text{H}$ -NMR of C6 polymer.

**$^1\text{H}$ -NMR (400MHz, Chloroform-*d*, TMS) (ppm):**  $\delta$  =6,41 (d,  $\text{CH}_2=\text{CH}-$ ), 6,15 (d,  $\text{CH}_2=\text{CH}-$ ), 5,87 (d,  $\text{CH}_2=\text{CH}-$ ), 4,21 (br,  $\text{CH}_2-\text{O}-\text{C}(=\text{O})-\text{CH}=\text{CH}_2$ ), 4,11 (t,  $-\text{CH}_2-\text{CH}_2-\text{O}-$ ), 3,64 (t,  $\text{CH}_2-\text{CH}_2-\text{OH}$ ), 2,79 (br,  $-\text{CH}_2-\text{CH}_2-\text{N}-$ ), 2,46 (br,  $-\text{N}-\text{CH}_2-\text{CH}_2-\text{C}(=\text{O})-\text{O}$ ), 1,83 - 1,60 (br,  $-\text{O}-\text{CH}_2-\text{CH}_2-\text{CH}_2-\text{CH}_2-\text{O}$ ), 1,40- 1,18 (br,  $-\text{CH}_2-\text{CH}_2-\text{CH}_2-\text{CH}_2-\text{OH}$ ,  $\text{N}-(\text{CH}_2)_2-\text{CH}_2-(\text{CH}_2)_2-\text{OH}$ ), 0,90 (t,  $\text{CH}_2-\text{CH}_2-\text{CH}_3$ ).

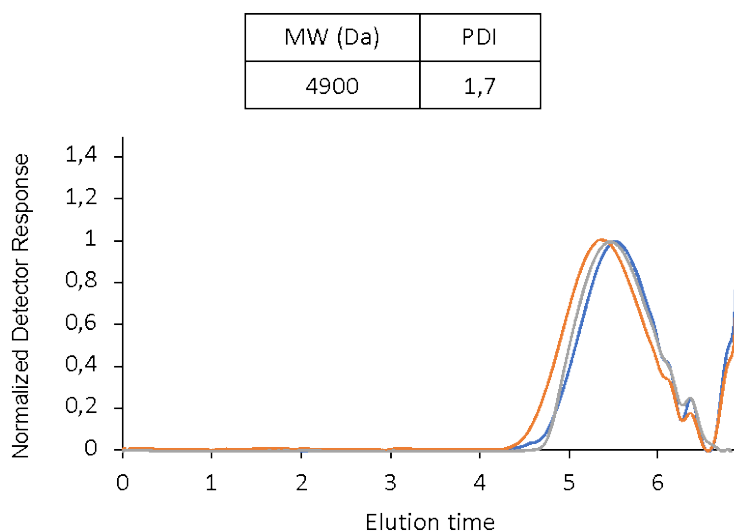

**Figure S2:** Molecular weight of C6 Polymer was determined by HPLC.

## C6-CR3 Polymer

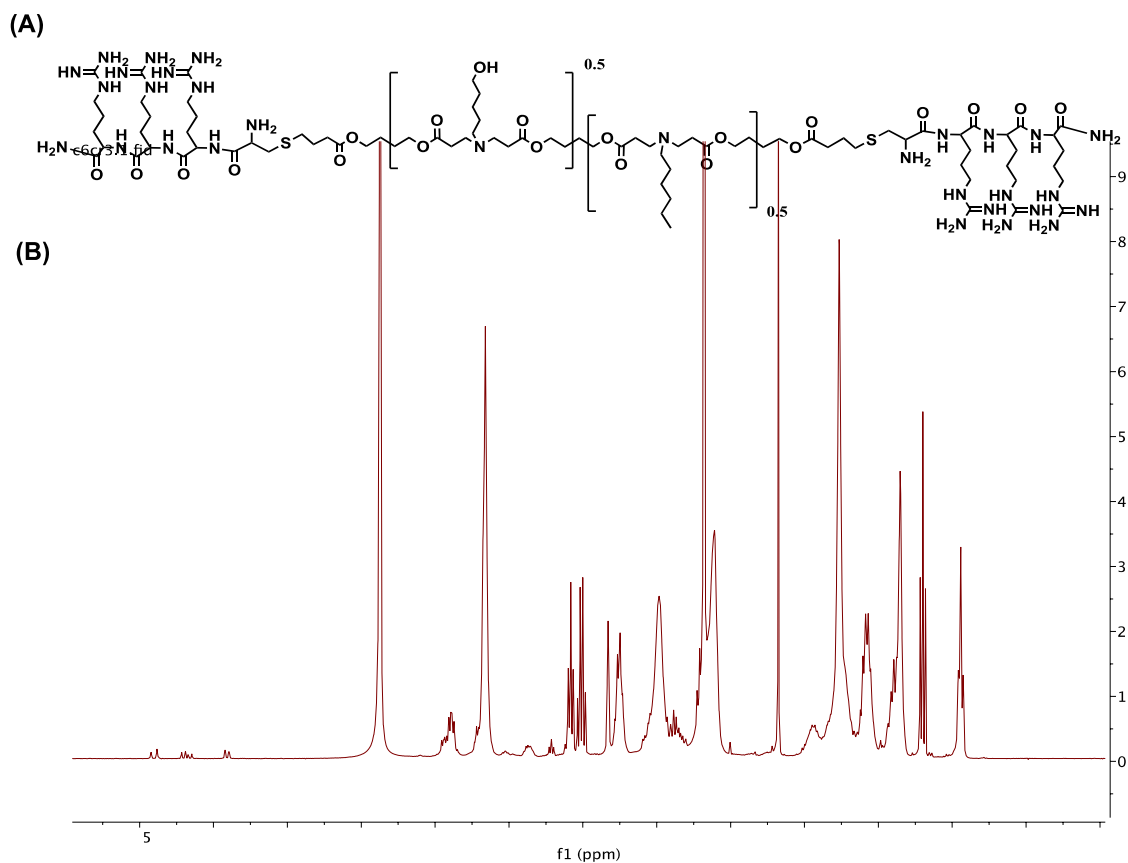

**Figure S3:** (A) Chemical structure of C6-CR3 polymer. (B)  $^1\text{H}$ -NMR of C6-CR3 polymer.

**$^1\text{H}$ -NMR (400MHz, Methanol- $d_4$ , TMS) (ppm):**  $\delta$  = 4.41-4.33 (br,  $\text{NH}_2\text{-C(=O)-CH-NH-C(=O)-CH-NH-C(=O)-CH-NH-C(=O)-CH-CH}_2\text{-}$ ), 4.16 (t,  $\text{CH}_2\text{-CH}_2\text{-O}$ ), 3.58 (t,  $\text{CH}_2\text{-CH}_2\text{-OH}$ ), 3.25 (br,  $\text{NH}_2\text{-C(=NH)-NH-CH}_2\text{-}$ ), 2.82 (dd,  $\text{-CH}_2\text{-S-CH}_2\text{-}$ ), 2.48 (br,  $\text{-N-CH}_2\text{-CH}_2\text{-C(=O)-O}$ ), 1.90 (m,  $\text{NH}_2\text{-C(=NH)-NH-(CH}_2\text{)}_2\text{-CH}_2\text{-CH-}$ ), 1.73 (br,  $\text{-O-CH}_2\text{-CH}_2\text{-CH}_2\text{-CH}_2\text{-O}$ ), 1.69 (m,  $\text{NH}_2\text{-C(=NH)-NH-CH}_2\text{-CH}_2\text{-CH}_2\text{-}$ ), 1.56 (br,  $\text{-CH}_2\text{-CH}_2\text{-CH}_2\text{-CH}_2\text{-OH}$ ), 1.39 (br,  $\text{-N-(CH}_2\text{)}_2\text{-CH}_2\text{-(CH}_2\text{)}_2\text{-OH}$ ), 0.88 (t,  $\text{CH}_2\text{-CH}_2\text{-CH}_3$ ).

## C6-CK3 Polymer

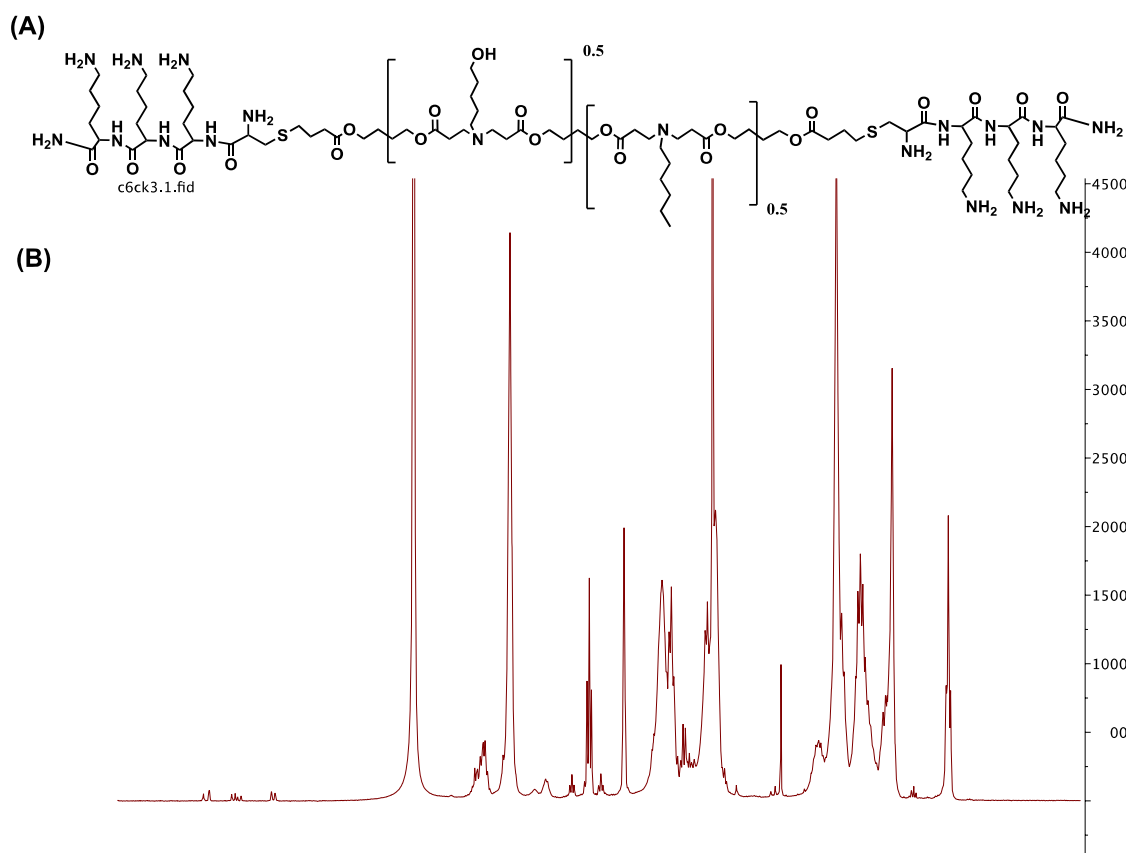

**Figure S4:** (A) Chemical structure of C6-CK3 polymer. (B)  $^1\text{H}$ -NMR of C6-CK3 polymer.

**$^1\text{H}$ -NMR (400MHz, Methanol- $d_4$ , TMS) (ppm):**  $\delta$  = 4.38-4.29 (br,  $\text{NH}_2\text{-(CH}_2\text{)}_4\text{-CH-}$ ), 4.13 (t,  $\text{CH}_2\text{-CH}_2\text{-O-}$ ), 3.73 (br,  $\text{NH}_2\text{-CH-CH}_2\text{-S-}$ ), 3.55 (t,  $\text{CH}_2\text{-CH}_2\text{-OH}$ ), 2.94 (br,  $\text{CH}_2\text{-CH}_2\text{-N-}$ ,  $\text{NH}_2\text{-CH}_2\text{-(CH}_2\text{)}_3\text{-CH-}$ ), 2.81 (dd,  $\text{-CH}_2\text{-S-CH}_2\text{-}$ ), 2.57 (br,  $\text{-N-CH}_2\text{-CH}_2\text{-C(=O)-O-}$ ), 1.85 (m,  $\text{NH}_2\text{-(CH}_2\text{)}_3\text{-CH}_2\text{-CH-}$ ), 1.74 (br,  $\text{-O-CH}_2\text{-CH}_2\text{-CH}_2\text{-CH}_2\text{-O-}$ ), 1.68 (m,  $\text{NH}_2\text{-CH}_2\text{-CH}_2\text{-(CH}_2\text{)}_2\text{-CH-}$ ), 1.54 (br,  $\text{-CH}_2\text{-CH}_2\text{-CH}_2\text{-CH}_2\text{-OH}$ ), 1.37 (br,  $\text{N-(CH}_2\text{)}_2\text{-CH}_2\text{-(CH}_2\text{)}_2\text{-OH}$ ), 0.88 (t,  $\text{CH}_2\text{-CH}_2\text{-CH}_3$ ).

## C6-CH3 Polymer

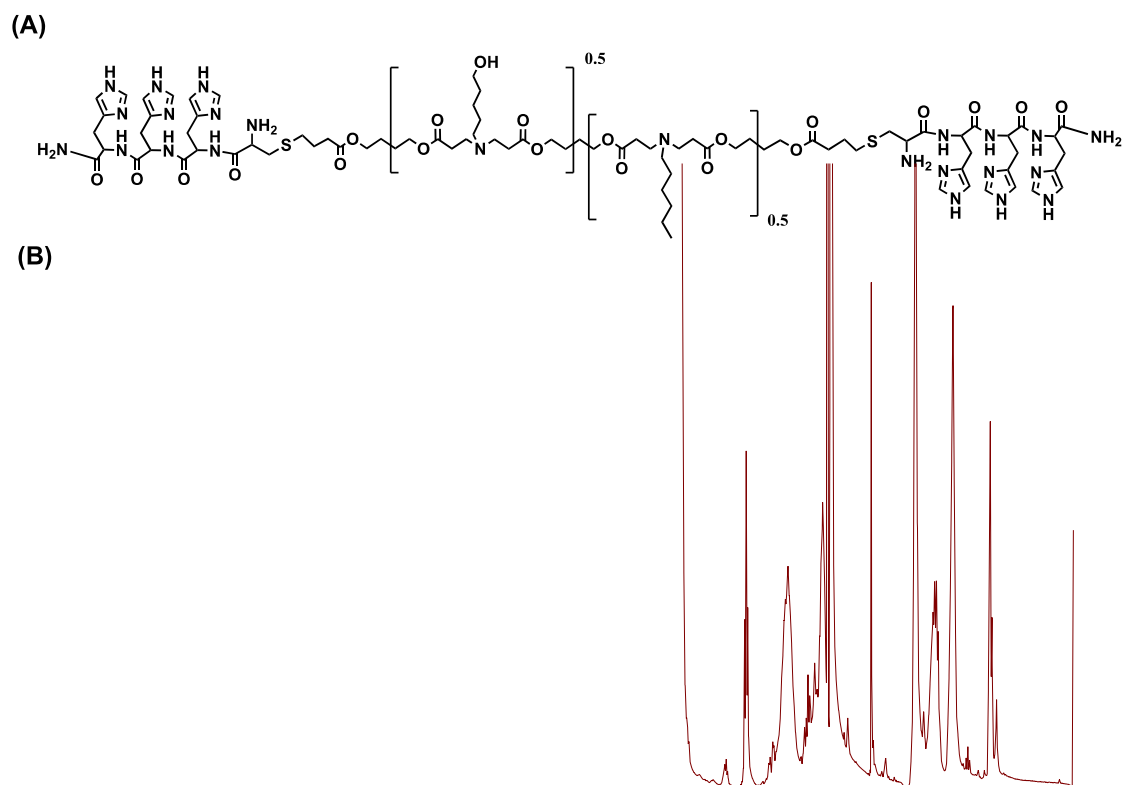

**Figure S5:** (A) Chemical structure of C6-CH3 polymer. (B) <sup>1</sup>H-NMR of C6-CH3 polymer.

**<sup>1</sup>H-NMR (400MHz, Methanol-*d*<sub>4</sub>, TMS) (ppm):**  $\delta$  = 8.0-7.0 (br -N(=CH)-NH-C(=CH)-), 4.61-4.36 (br, -CH<sub>2</sub>-CH-), 4.16 (t, CH<sub>2</sub>-CH<sub>2</sub>-O-), 3.55 (t, CH<sub>2</sub>-CH<sub>2</sub>-OH), 3.18 (t, CH<sub>2</sub>-CH<sub>2</sub>-N-), 3.06 (dd, -CH<sub>2</sub>-CH-), 2.88 (br, OH-(CH<sub>2</sub>)<sub>4</sub>-CH<sub>2</sub>-N-), 2.82 (dd, -CH<sub>2</sub>-S-CH<sub>2</sub>-), 2.72 (br, -N-CH<sub>2</sub>-CH<sub>2</sub>-C(=O)-O), 1.75 (br, -O-CH<sub>2</sub>-CH<sub>2</sub>-CH<sub>2</sub>-CH<sub>2</sub>-O), 1.65 (m, NH<sub>2</sub>-CH<sub>2</sub>-CH<sub>2</sub>-(CH<sub>2</sub>)<sub>2</sub>-CH-), 1.58 (br, -CH<sub>2</sub>-CH<sub>2</sub>-CH<sub>2</sub>-CH<sub>2</sub>-OH), 1.40 (br, N-(CH<sub>2</sub>)<sub>2</sub>-CH<sub>2</sub>-(CH<sub>2</sub>)<sub>2</sub>-OH), 0.88 (t, CH<sub>2</sub>-CH<sub>2</sub>-CH<sub>3</sub>).

## C6-CD3 Polymer

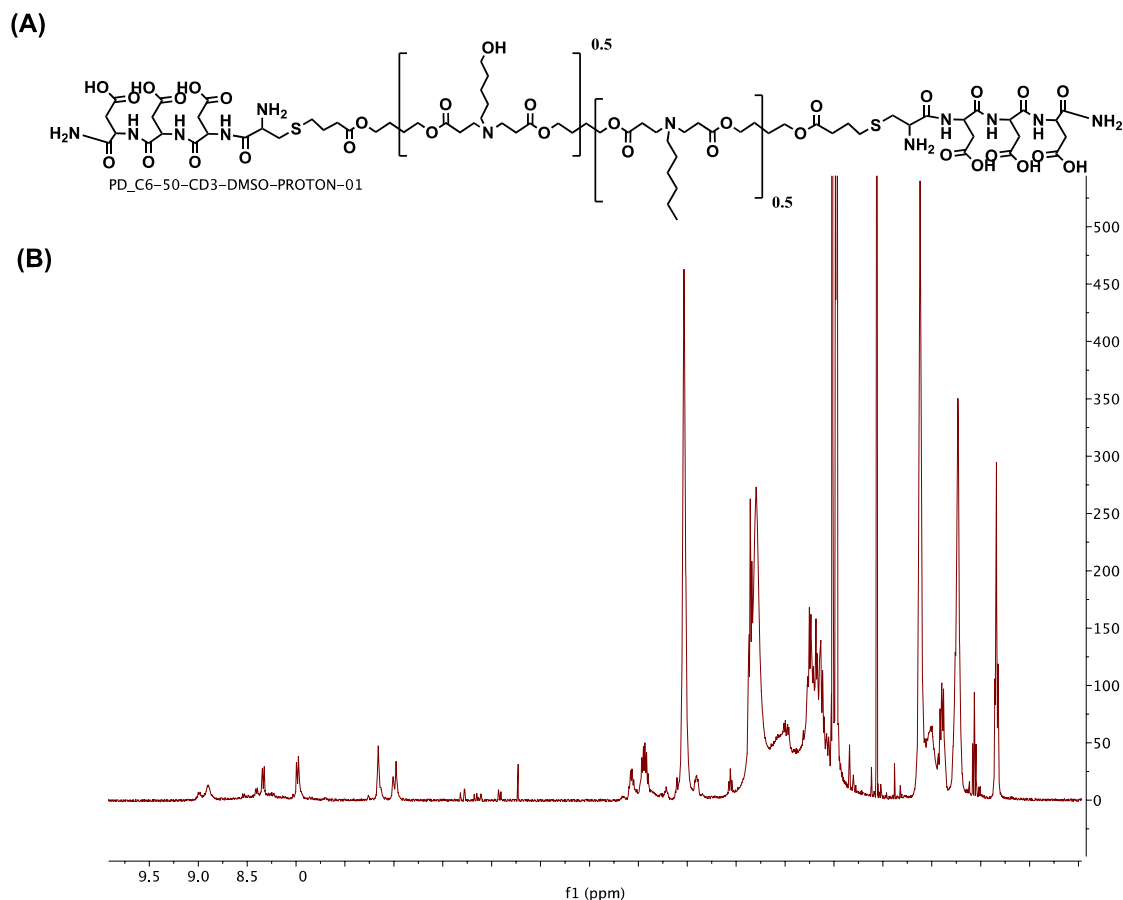

**Figure S6:** (A) Chemical structure of C6-CD3 polymer. (B) <sup>1</sup>H-NMR of C6-CD3 polymer.

**<sup>1</sup>H-NMR (400MHz, DMSO-*d*<sub>6</sub>, TMS) (ppm):**  $\delta$  = 4.56-4.44 (br, NH<sub>2</sub>-C(=O)-CH-NH-C(=O)-CH-NH-C(=O)-CH-NH-C(=O)-CH-CH<sub>2</sub>-), 4.19 (br, NH<sub>2</sub>-CH-CH<sub>2</sub>-S), 4.00 (t, CH<sub>2</sub>-CH<sub>2</sub>-O), 3.34 (t, CH<sub>2</sub>-CH<sub>2</sub>-OH), 2.98 (dd, -CH<sub>2</sub>-S-CH<sub>2</sub>), 2.57-2.48 (t, -CH-CH<sub>2</sub>-COO-), 2.40 (br, -N-CH<sub>2</sub>-CH<sub>2</sub>-C(=O)-O), 1.60 (br, -O-CH<sub>2</sub>-CH<sub>2</sub>-CH<sub>2</sub>-CH<sub>2</sub>-O), 1.38 (br, -CH<sub>2</sub>-CH<sub>2</sub>-CH<sub>2</sub>-CH<sub>2</sub>-OH), 1.20 (br, -N-(CH<sub>2</sub>)<sub>2</sub>-CH<sub>2</sub>-(CH<sub>2</sub>)<sub>2</sub>-OH), 0.88 (t, CH<sub>2</sub>-CH<sub>2</sub>-CH<sub>3</sub>).

## 2. Synthesis of HPMA monomer

N-(2-hydroxypropyl)methacrylamide (HPMA) monomer was synthesized by acylation of 1-aminopropan-2-ol with methacryloyl chloride using anhydrous sodium hydrogen carbonate (NaHCO<sub>3</sub>). NaHCO<sub>3</sub> was used as a base to quench HCl byproduct obtained during the HPMA synthesis. The

reaction was stirred in order to ensure that the two phases formed by NaHCO<sub>3</sub> and organic DCM solvent were vigorously mixed. The reaction was carried out at -20 °C and the final product was recrystallized from Et<sub>2</sub>O:MeOH (3:1). The chemical structure analyzed by <sup>1</sup>H-NMR was in concordance with the previously described HPMA structure.<sup>[2]</sup>

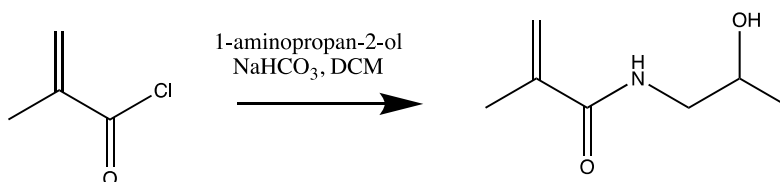

**Figure S7: Synthesis of HPMA monomer.**

<sup>1</sup>H-NMR (200 MHz, CDCl<sub>3</sub>, TMS) (ppm): δ = 6.63 (s, 1H, NH), 5.71 (s, 1H, H- 3ii), 5.32 (t, 1H, H- 3i), 3.91 (m, 1H, H-6), 3.70 (d, 1H, OH), 3.46 (dq, 1H), 3.13 (m, 1H), 1.94 (s, 3H, H-1), 1.16 (d, 3H, H- 7)

IR (ATIR) ν = 659, 824, 845, 914, 1001, 1053, 1088, 1117, 1142, 1232, 1263, 1331, 1427, 1553, 1614, 1653, 2933, 2976, 3275, 3306 cm<sup>-1</sup>

### 3. Synthesis of Ma-acap-TT monomer

Ma-acap-TT monomer was synthesized in two steps. First, Ma-acap-OH intermediate was obtained by acylation of aminocaproic acid with methacryloyl chloride in aqueous NaOH, in a procedure known as the Schotten-Baumann reaction (highly exothermic reaction). Then, Ma-acap-OH was recrystallized twice using EtOAc:Et<sub>2</sub>O. The intermediate Ma-acap-OH chemical composition was confirmed by <sup>1</sup>H-NMR and the results were in concordance with with previously described Ma-acap-OH structure by Šubr and colleagues.<sup>[3]</sup>

Once Ma-acap-OH intermediate was synthesized, Ma-acap-TT was obtained by acylation of 2-thiazoline-2-thiol (TT) with the free carboxylic group of Ma-acap-OH using dicyclohexylcarbodiimide (DCC) and a catalytic amount of 4-dimethyl-aminopyridine (DMAP) in THF. The reaction was confirmed by the formation of white crystalline precipitate N,N'-dicyclohexylurea salt (DCU). Then, DCU salt was removed by filtration and the final product was recrystallized using ethanol. Chemical structure analysed by  $^1\text{H-NMR}$  was in concordance with previously described HPMA structure.<sup>[3]</sup>

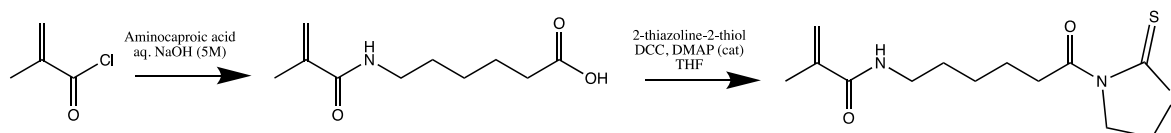

**Figure S8: Synthesis of Ma-acap-TT monomer.**

$^1\text{H-NMR}$  (200 MHz,  $\text{CDCl}_3$ , TMS) (ppm):  $\delta$  = 5.86 (s, 1H, NH), 5.67 (s, 1H, H-3ii), 5.31 (t, 1H, H-3i), 4.58 (t, 2H, H-13), 3.29 (m, 6H, H-5, H-9, H-12), 1.97 (s, 3H, H-1), 1.80 – 1.30 (m, 6H, H-6 H-7 H-8)

IR (ATIR)  $\nu$  = 677, 717, 878, 933, 1005, 1039, 1150, 1232, 1279, 1356, 1387, 1549, 1605, 1651, 1697, 2855, 2930, 3284  $\text{cm}^{-1}$

#### 4. Synthesis of pHPMA-TT copolymers

HPMA (3.0 g, 20.9 mmol), Ma-acap-TT (0.7 g, 2.3 mmol), and AIBN (0.59 g, 3.6 mmol) were dissolved in dry DMSO (25.3 g, 17.1 mL), and allowed to polymerize by reversible addition-fragmentation chain transfer (RAFT) reactions at 60  $^{\circ}\text{C}$  for 6 hours under inert atmosphere. The presence of TT groups was confirmed by  $^1\text{H-NMR}$ .

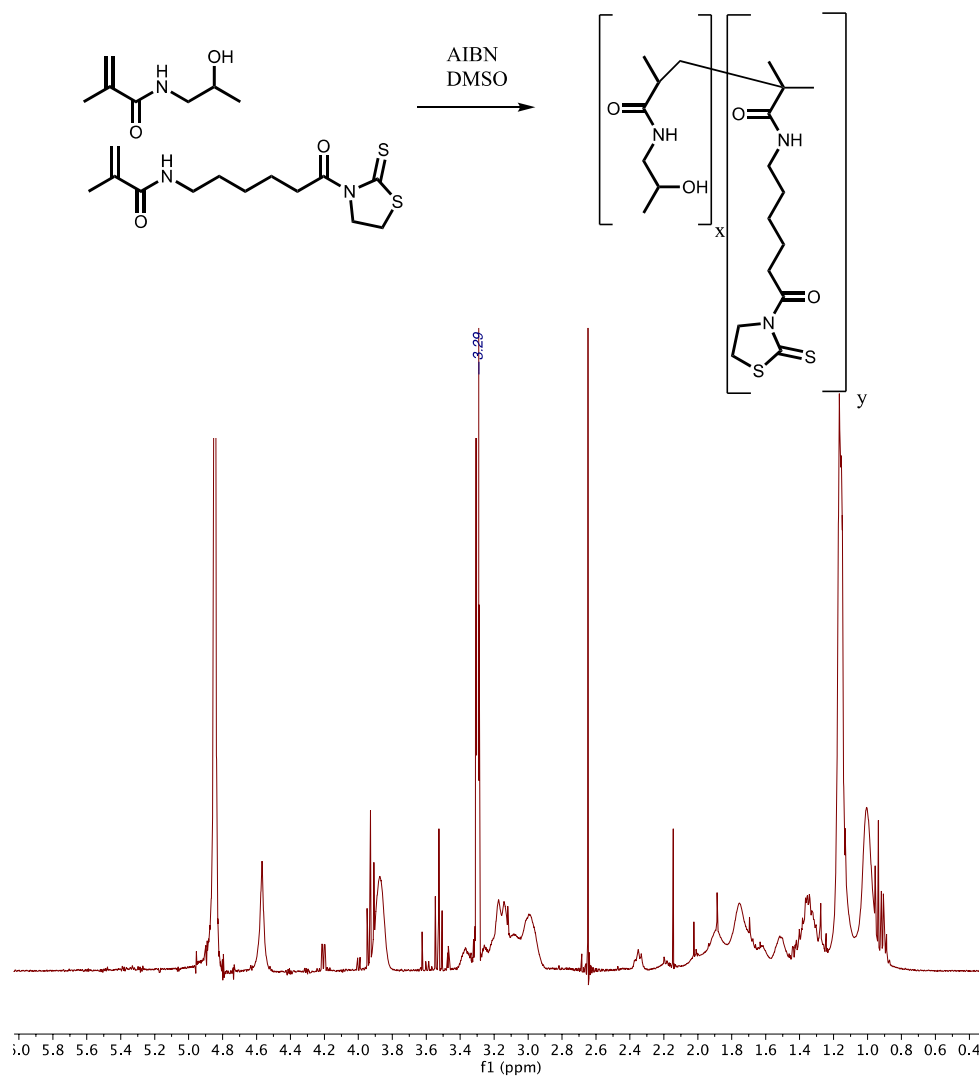

**Figure S9:** (A) Chemical structure of pHPMA-TT polymer. (B)  $^1\text{H}$ -NMR of pHPMA-TT polymer.

## 5. Synthesis of pHPMA-TT-Mal copolymer

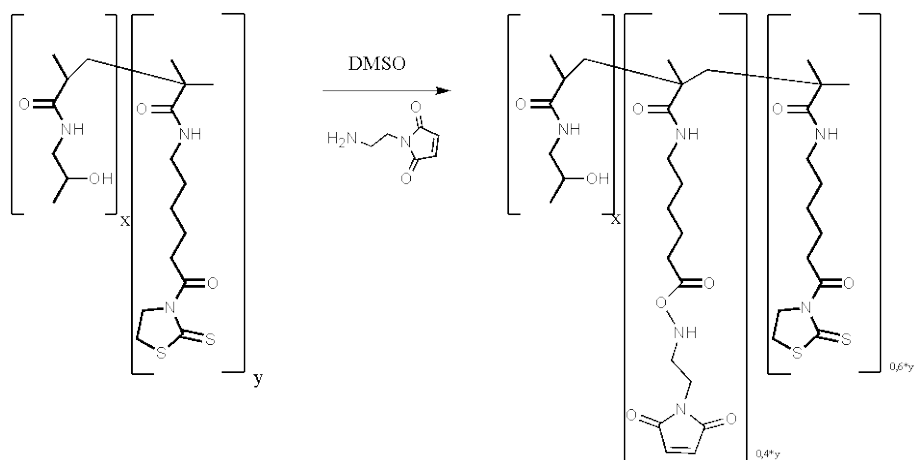

**Figure S10:** Synthesis of pHPMA-TT-Mal polymer. 40% of TT-group from pHPMA-TT copolymer were modified using amino-maleimide.

## 6. Characterization of VHPK-targeted NPs.

(A)

|                | DLS         |            |               | NTA          |
|----------------|-------------|------------|---------------|--------------|
|                | Size (nm)   | Z-Pot (mV) | PDI           | Size (nm)    |
| pBAE NP        | 70.0 ± 1.3  | 21.5 ± 1.0 | 0.124 ± 0.061 | 74.6 ± 18.6  |
| c-pBAE NP      | 93.4 ± 3.8  | 6.0 ± 1.0  | 0.131 ± 0.081 | 108.7 ± 36.3 |
| VHPK-c-pBAE NP | 100.8 ± 2.1 | 8.1 ± 0.9  | 0.158 ± 0.107 | 126 ± 57.0   |

(B)

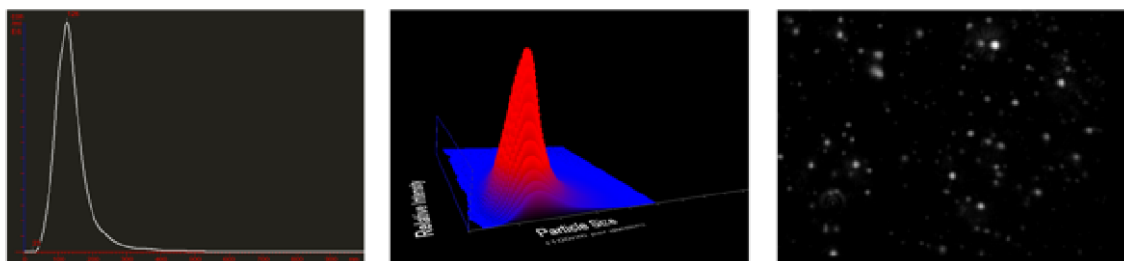

**Figure S11: Characterization of VHPK-targeted NPs.** (A) Hydrodynamic size, zeta-potential (Z-Pot), and Polydispersity (PDI) of coated and non-coated pBAE NPs, and targeted and non-targeted pBAE NPs were determined by Dynamic Light Scattering (DLS) and Nanoparticle Tracking Analysis (NTA). Results are shown as the mean  $\pm$  s.e.m of triplicates. (B) Size distribution (left), bimodal distribution size-polydispersity (middle), and nanoparticle image (right) was determined by Nanoparticle Tracking Analysis.

## 7. pHPMA coating optimization in C6-KH nanoparticles

Different pHPMA copolymer quantities were combined with the pBAE NPs in order to determine the optimal pHPMA/pBAE NP ratio (ranging from 3.12% to 50% w/w). NP synthesis was carried out as previously described, and their ability to deliver anti-miR-Cy3 was tested by flow cytometry.

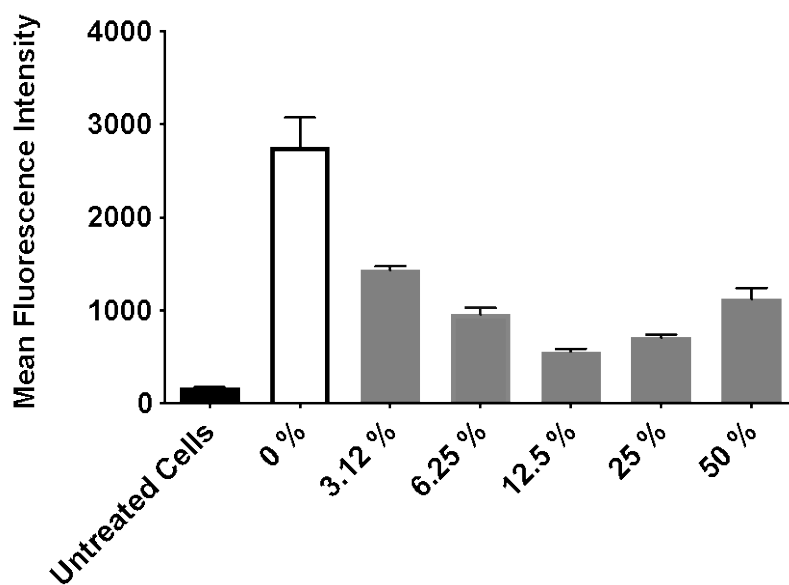

**Figure S12: pHPMA coating optimization in C6-KH nanoparticles.** Different pHPMA coating percentages were added over C6-KH pBAE NPs containing anti-miRNA-Cy3, ranging from 0 to 50% w/w. Their uptake efficiencies were analyzed by flow cytometry in iMAECs. Data are represented as mean  $\pm$  SEM (n = 3).

## 8. Non-selective uptake of VHPK-c-pBAE NPs in healthy iMAECs

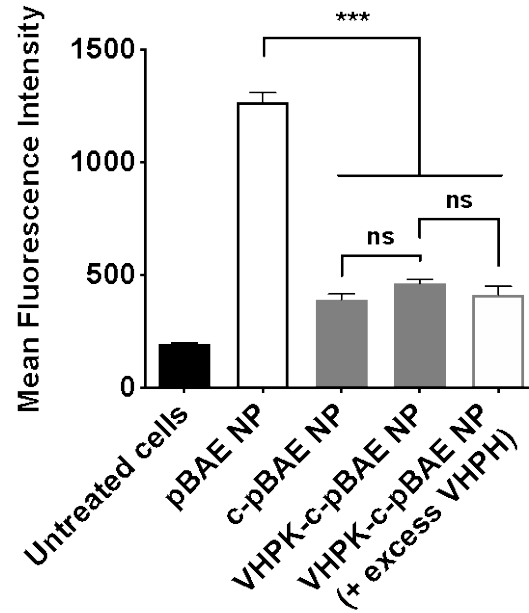

**Figure S13: Non-selective uptake of VHPK-c-pBAE NPs in healthy iMAECs.** pBAE NPs containing anti-miR-Cy3 were coated with pHPMA-TT polymer (c-pBAE NP) and conjugated with VHPK peptide (VHPK-c-pBAE NP). Internalization efficiency was tested at 2 hours post-transfection using healthy iMAECs by flow cytometry. To assess VHPK-mediated internalization, the VCAM-1 receptor in healthy iMAECs was blocked using excess VHPK peptide. Data are represented as mean  $\pm$  SEM (n = 3). Multiple comparisons among groups were determined using one-way ANOVA followed by a post-hoc test. *P*-value: \* $p < 0.05$ , \*\* $p < 0.01$ , \*\*\* $p < 0.001$ .

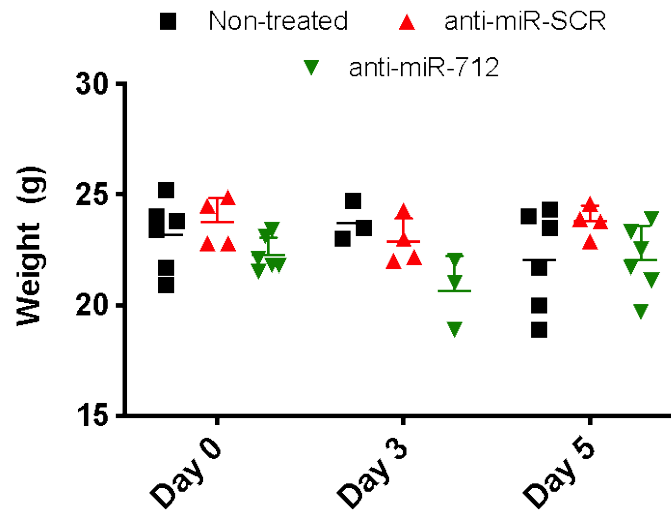

**Figure S14:** Mice weight monitoring after anti-miR-712 and anti-miR-SCR injection using VHPK-c-pBAE NP at 1 mg kg<sup>-1</sup>. n = 5, data shown as mean  $\pm$  s.e.m.

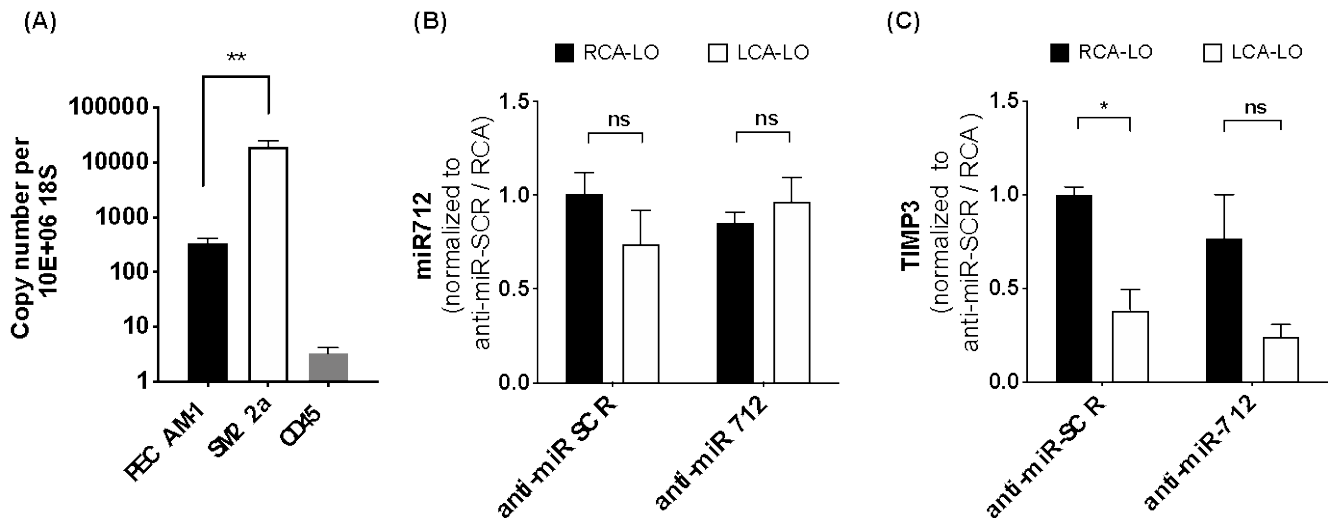

**Figure S15:** (A) Quality criteria of leftover (LO) smooth muscle cell-enriched layer was determined by analyzing PECAM-1 as an endothelial marker, SM22a as a smooth muscle cell marker and CD45 as an immune cell marker. Statistical significance was analyzed between PECAM-1 and SM22a markers. (B) miR-712 and (C) TIMP3 expression was analyzed in LO smooth muscle cell-enriched samples from RCA and LCA at 48 hours post-injection in PCL mice model. Data are represented as mean  $\pm$  SEM (n = 5).

= 4-6). Pairwise comparisons were determined using Student t-tests. P-value: \* $p < 0.05$ , \*\* $p < 0.01$ , \*\*\* $p < 0.001$ .

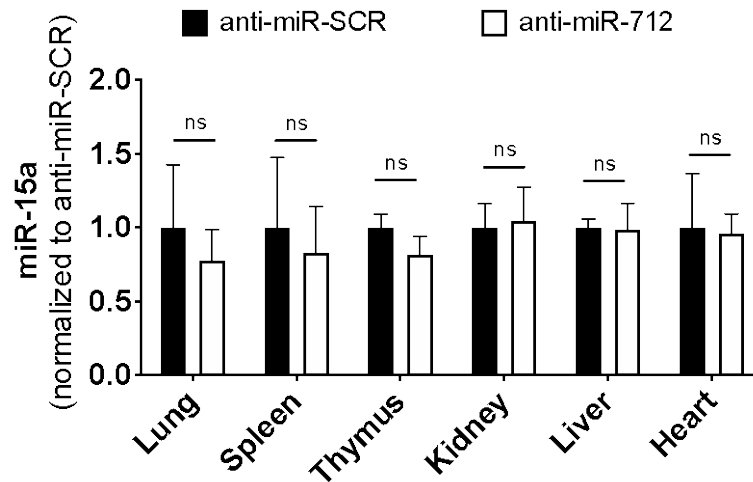

**Figure S16: miR-15a quantification in anti-miR-712 biodistribution study.** Data are represented as mean ± SEM (n = 5). Pairwise comparisons were determined using Student t-tests. P-value: \* $p < 0.05$ , \*\* $p < 0.01$ , \*\*\* $p < 0.001$ .

| Primer         | Forward Sequence               | Reverse Sequence               |
|----------------|--------------------------------|--------------------------------|
| 18S            | 5'-AGGAATTGACGGAAGGGCACCA-3'   | 5'-GTGCAGCCCCGGACATCTAAG-3'    |
| mPECAM1        | 5'-GCTGGTGCTCTATGCAAGC-3'      | 5'-ATGGATGCTGTTGATGGTGA-3'     |
| mSM22a         | 5'-CCTTCCAGTCCACAAACGAC-3'     | 5'-GTAGGATGGACCCTTGTTGG-3'     |
| mCD45          | 5'-CTTCAGTGGTCCCATTGTGGTG-3'   | 5'-TCAGACACCTCTGTCGCCTTAG-3'   |
| mTIMP3         | 5'-CACGGAAGCCTCTGAAAGTC-3'     | 5'-TCCCACCTCTCCACAAAGTT-3'     |
| mIL6           | 5'-TCCTCTGTGAAGTCTCCTCTCCGG-3' | 5'-TGGGACTGATGCTGGTGACAACCA-3' |
| mVCAM1         | 5'-GCTATGAGGATGGAAGACTCTGG-3'  | 5'-ACTTGTGCAGCCACCTGAGATC-3'   |
| mTNF- $\alpha$ | 5'-TGCTGGGAAGCCTAAAAG-3'       | 5'-CGAATTTTGAGAAGATGATCCTG-3'  |

**Table S1: Primers sequences used for qPCR analysis.**

## References

- [1] P. Dosta, V. Ramos, S. Borrós, *Mol. Syst. Des. Eng.* **2018**, 3, 677.
- [2] K. Ulbrich, V. Subr, J. Strohalm, D. Plocova, M. Jelinkova, B. Rihova, *J Control Release* **2000**, 64, 63.
- [3] V. U. Šubr, K., *React. Funct. Polym.* **2006**, 66, 1525.
